# Supplementary material for: RNA Sequencing Identifies Upregulated Kyphoscoliosis Peptidase and Phosphatidic Acid Signaling Pathways in Muscle Hypertrophy Generated by Transgenic Expression of Myostatin Propeptide
Source: MDPI journal article supplement (doi:10.3390/ijms16047976), 2015-04-09
Supplement: s1 [file s1]

# Supplementary Information

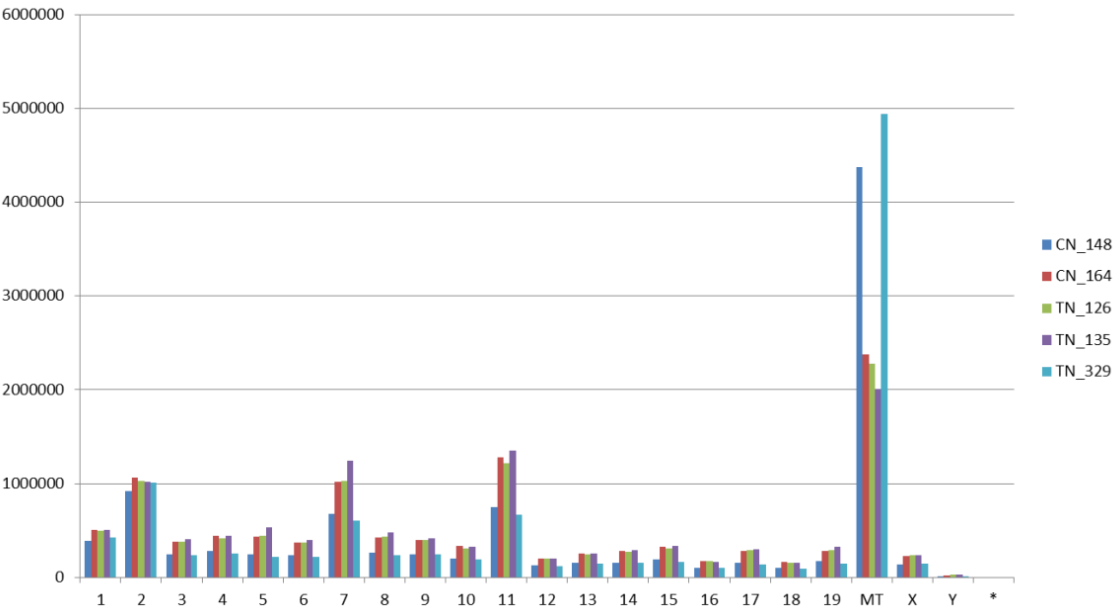

**Figure S1.** The abundance of mRNA reads mapped to each chromosome. The mark \* represent non-chromosome, nonchromosomal FASTA file download from ENSEMBEL database contains DNA that has not been assigned a chromosome.

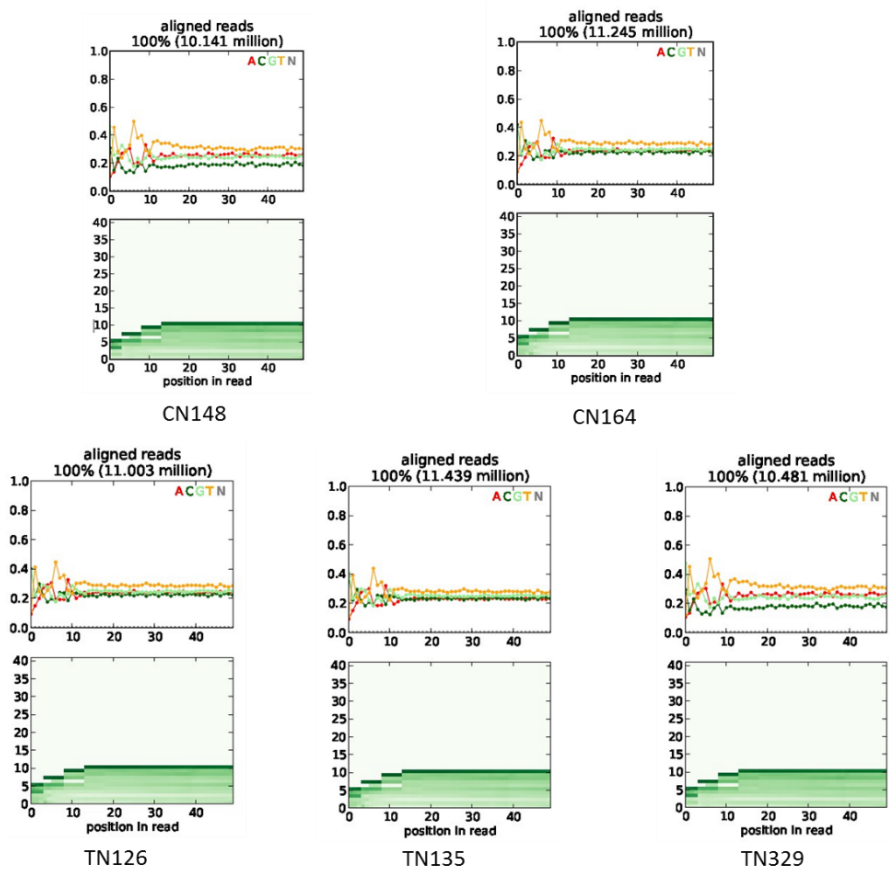

**Figure S2.** The sequencing quality assess of the five samples.

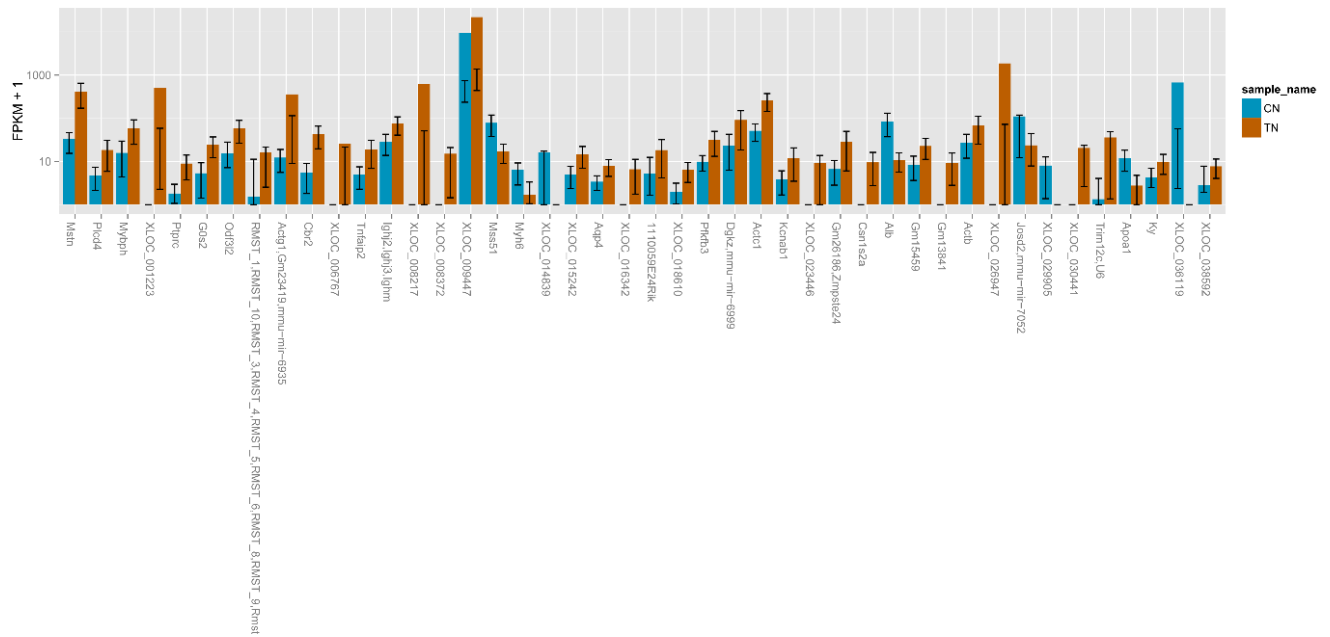

**Figure S3.** Bar plots for the significantly differentially expressed genes.

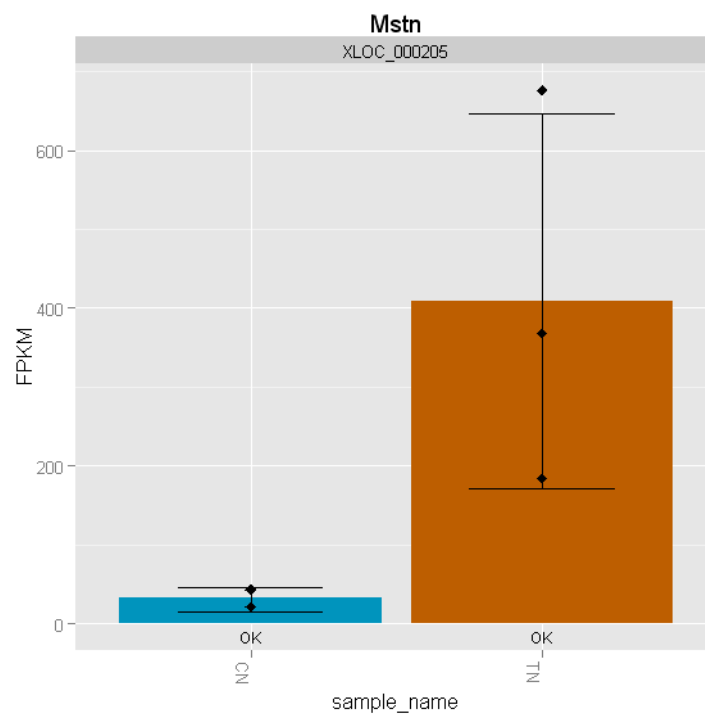

**Figure S4.** Bar plots of the expression level of MSTN propeptide.
